# Supplementary material for: L-carnitine prevents bovine oocyte aging and promotes subsequent embryonic development
Source: PubMed Central journal article supplement — J Reprod Dev. 2019 Aug 30;65(6):499–506. doi: 10.1262/jrd.2019-046 (PMC6923151; doi:10.1262/jrd.2019-046), 2019-08-30
Supplement: jrd-65-499-s001.pdf [file jrd-65-499-s001.pdf]

## **Supplementary materials (Parthenogenetic activation)**

### *Parthenogenetic activation (PA) and embryo culture*

After the fresh group, aged group, and aged + LC group were cultured for 24 h, 30 h, and 30 h, respectively, the oocytes were denuded by 0.1% hyaluronidase and activated in activation medium which comprised of CRI medium supplemented with 0.4% BSA (fatty acid-free BSA, Sigma A8806) (BSA-CRI) and Ionomycin (0.5  $\mu\text{mol/l}$ ) for 5 min. After activation, the oocytes were cultured in BSA-CRI medium contain 6-(Dimethylamino) purine (2 mmol/l) and overlaid by mineral oil for 4 h. After PA (day 0), the presumptive zygotes of the three groups were washed three times with 0.4% BSA-CRI droplets, placed in BSA-CRI medium and cultured to the 8-cell stage (72 h). Subsequently, the three groups were placed in 10% FBS-CRI medium and cultured to the blastocyst stage.

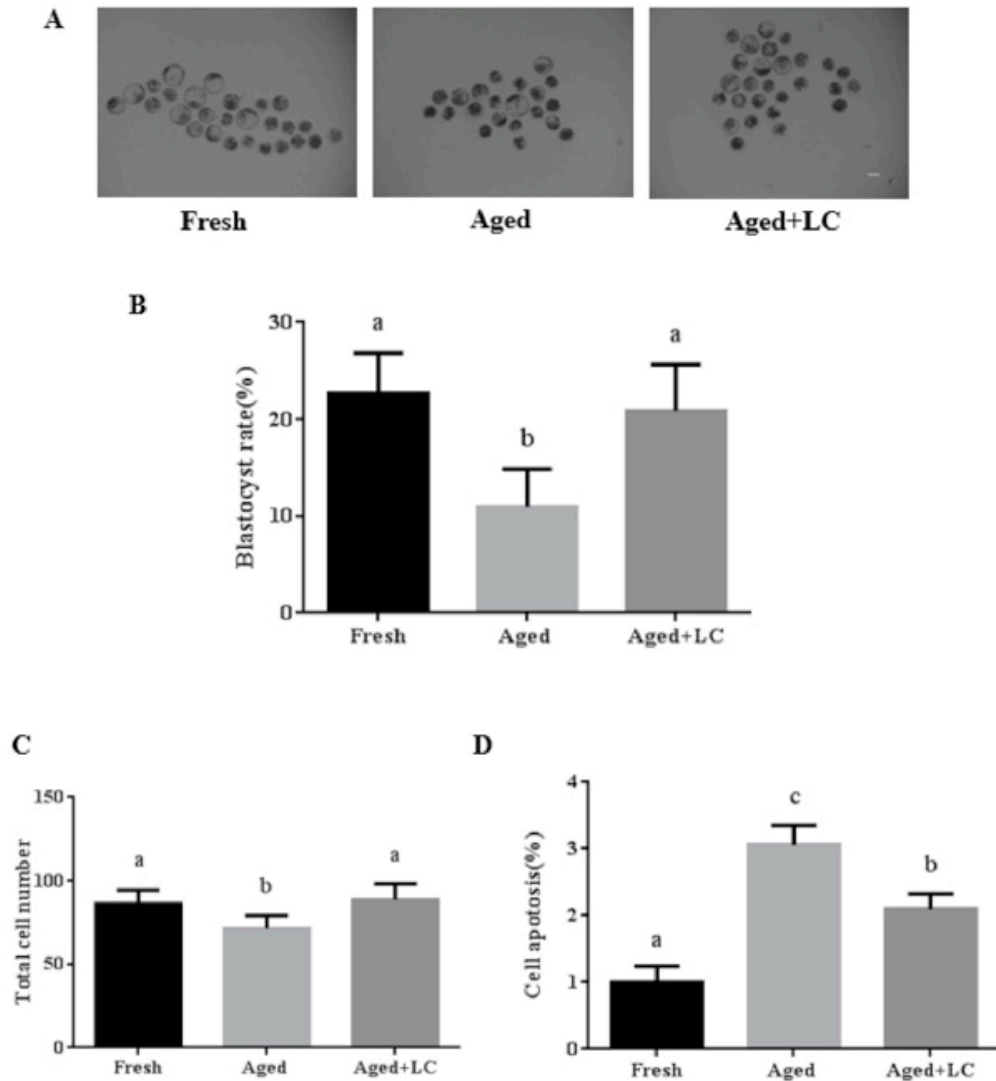

Effect of LC on the development and quality of aged bovine oocytes in vitro. (A) Blastocyst formation on day 7. Scale bar: 100  $\mu$ m. (B) Blastocyst rate. R = 4. (C) Total cell number in each day-7 blastocyst. R = 3. (D) The rate of cell apoptosis in the day-7 blastocysts, R = 3. Statistically significant differences are represented with different letters ( $p < 0.05$ ).
